# Supplementary material for: Modeling the Dynamic Behavior of Track Transitions Along Shared Track Corridors
Source: Frontiers journal article supplement (doi:10.3389/fbuil.2021.693744), 2021-07-29
Supplement: Table_1.docx [file Table_1.docx]

Supplementary Material

Table 1. Notations and values of track properties in the train-track-bridge model

| Track Properties | | | |
| --- | --- | --- | --- |
|  | |  |  | MPa |
|  | |  |  | mm4 |
|  | |  |  | MPa.mm4 |
|  | |  |  | kg/m |
|  | |  |  | kN.s/m |
|  | |  |  | kN/m |
|  | |  |  | kg |
|  | |  |  | kg |
|  | |  |  | kN.s/m |
|  | |  |  | kN/m |
|  | |  |  | kN/m |
|  | |  |  | kN.s/m |
|  | |  |  | kN/m |
|  | |  | - |  |
|  | |  | - |  |
|  | |  | - |  |
|  | |  |  | kN/m |
|  | |  |  | kN/m |
|  | |  |  | mm |
